# Supplementary material
Source: PubMed Central journal article supplement (PMC3494939)
Supplement: 1209896109_pnas.201209896SI.pdf [file 1209896109_pnas.201209896SI.pdf]

# Supporting Information

Knapp et al. 10.1073/pnas.1209896109

## SI Text

All DNA extraction and 454 sequencing library preparation before PCR amplification were conducted in the purpose-built University of Otago aDNA facility. The facility is located in a building with no other molecular laboratories. It is fitted with a positive pressure system and HEPA air filters. The facility is UVC-irradiated ( $\lambda = 254 \text{ nm}$ ) when not in use, and all surfaces are regularly bleached. It is fitted with separate, UVC-irradiated,

enclosed workspaces for sample manipulation, DNA extraction and manipulation, and PCR setup. Consumables are delivered directly to the facility and, where possible, UVC treated before entering the core (clean room) of the facility. No laboratory equipment has ever been used in a post-PCR laboratory. Access is limited to trained staff who enter the facility only first thing in the morning, before having entered any building containing post-PCR laboratories (1).

1. Knapp M, Clarke AC, Horsburgh KA, Matisoo-Smith EA (2011) Setting the stage: Building and working in an ancient DNA laboratory. *Ann Anat* 194(1):3–6.

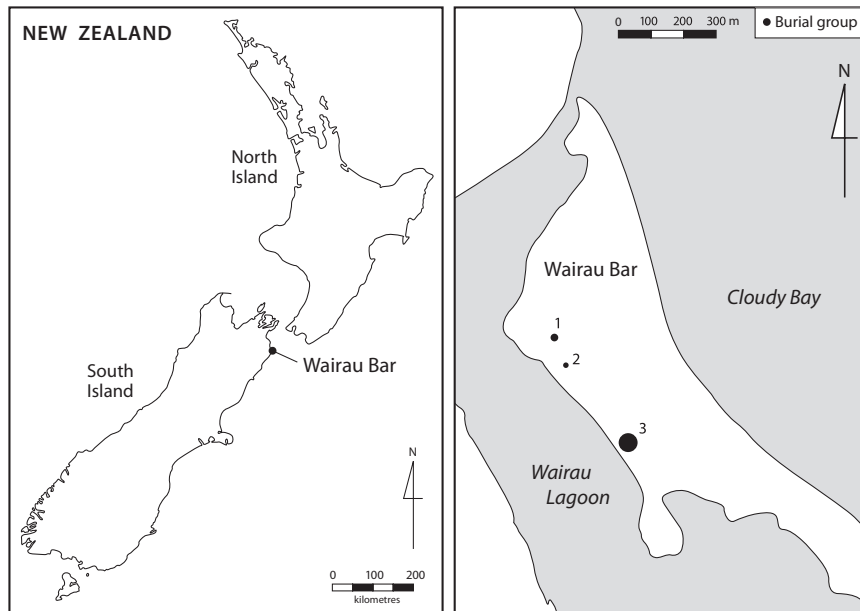

Fig. S1. Location of the Wairau Bar archaeological site (Left) and a site map identifying the general location of the three burial groups at Wairau Bar (Right).



1. Briggs AW, et al. (2007) Patterns of damage in genomic DNA sequences from a Neandertal. *Proc Natl Acad Sci USA* 104(37):14616–14621.
2. Krause J, et al. (2010) A complete mtDNA genome of an early modern human from Kostenki, Russia. *Curr Biol* 20(3):231–236.
3. Sawyer S, Krause J, Guschanski K, Savolainen V, Pääbo S (2012) Temporal patterns of nucleotide misincorporations and DNA fragmentation in ancient DNA. *PLoS ONE* 7(3):e34131.

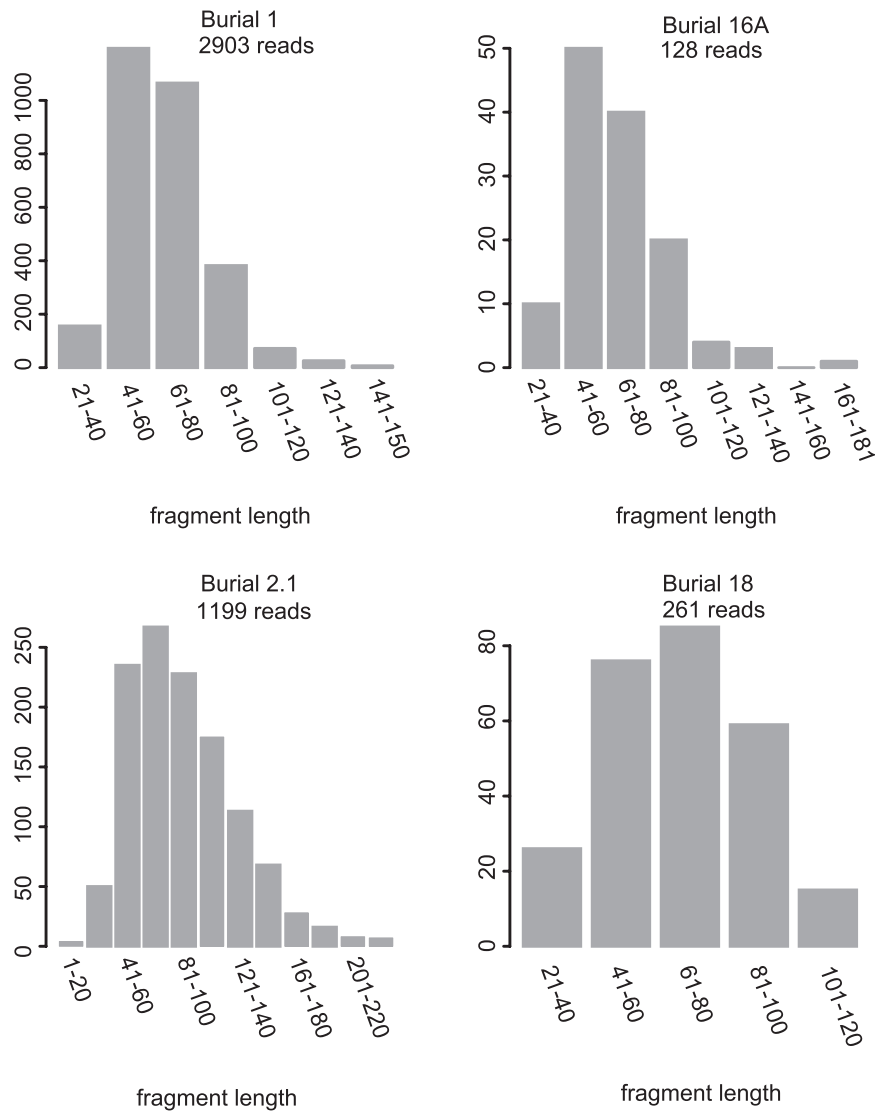

**Fig. S4.** Size distribution of endogenous mtDNA fragments from burials 1, 2.1, 16A, and 18. Number of reads and fragment length are provided.





**Table S2. Private mutations**

| Private mutations | 4917G | 8790A | 12174T |
|-------------------|-------|-------|--------|
| Burial 2.1        | 5/0   | 5/0   |        |
| Burial 16A        |       |       | 4/0    |

Number of reads covering SNP/number of reads conflicting with consensus.

**Table S3. Number of reads supporting bait (T2b) mutations**

| T2b mutations | 709A | 930A | 1888A | 4216C | 4917G | 5147A | 8697A | 10463C | 11251G | 11812G | 13368A | 14233G | 14905A | 15452A | 15607G | 15928A | 16126C | 16294T | 16304C |
|---------------|------|------|-------|-------|-------|-------|-------|--------|--------|--------|--------|--------|--------|--------|--------|--------|--------|--------|--------|
| Burial 1      | 5/0  | 3/0  | 5/0   | 11/0  | 12/0  | 8/0   | 13/0  | 6/0    | 13/0   | 25/0   | 12/0   | 13/0   | 23/0   | 11/0   | 10/0   | 6/0    | 8/0    | 4/0    | 7/0    |
| Burial 2.1    | 5/0  | 10/0 | 7/0   | 2/0   | 5/5   | 5/0   | 9/0   | 11/0   | 13/0   | 8/0    | 9/0    | 6/0    | 9/1    | 10/0   | 8/0    | 5/0    | 3/0    | 2/0    | 4/0    |
| Burial 16A    | 0/0  | 0/0  | 0/0   | 0/0   | 0/0   | 1/0   | 0/0   | 0/0    | 5/0    | 0/0    | 6/0    | 3/0    | 0/0    | 0/0    | 3/0    | 3/0    | 0/0    | 0/0    | 0/0    |
| Burial 18     | 2/0  | 0/0  | 1/1   | 0/0   | 2/0   | 1/0   | 1/0   | 0/0    | 2/0    | 3/0    | 0/0    | 1/0    | 1/0    | 0/0    | 2/0    | 1/0    | 0/0    | 0/0    | 1/0    |

Number of reads covering informative SNP/number of those reads supporting bait. Red, reads supporting bait are present.
